# Supplementary material
Source: Preprints.org preprint supplement (doi:10.20944/preprints201912.0319.v1)
Supplement: Supplementary file 1 [file BioNumbers_Kcat_records.xlsx]

## Sheet: Sheet1
Bion id	Property	Organism	Value	Units	Reference	Pmid	Measurement method
100963	Kcat of Hexokinase in Muscle	Rabbit	720000	1/hour	Cellular concentrations of Enzymes and Their Substrates, K.R. Albe et al, 1990, Journal of Theoretical Biology	PMID: 2200929	The values were calculated based on values mentioned in the Tables 1 and 2 of the cited literature
101003	Kcat of Aldolase A in muscle	Rabbit	127980	1/hour	Cellular concentrations of Enzymes and Their Substrates, K.R. Albe et al, 1990, Journal of Theoretical Biology	PMID: 2200929	The values were calculated based on values mentioned in the Tables 1 and 2 of the cited literature
100961	Kcat of Glucokinase in Liver	Rat Rattus norvegicus	258000	1/hour	The preparation and characterization of pure rat liver glucokinase. Grossman SH, Dorn CG, Potter VR. J Biol Chem. 1974 May 25249(10):3055-60.	PMID: 4830235	The values were calculated based on values mentioned in the cited literature
101172	Kcat of Succinate dehydrogenase in heart	Pig Sus species	600000	1/hour	Sucinate dehydrogenase. Veeger C et al. Meth. Enzymol. 13, 81-90, 1969.	not available online	The values were calculated based on values mentioned in the cited literature
101141	Kcat of Pyruvate carboxylase in liver	Rat Rattus norvegicus	228000	1/hour	Rat liver pyruvate carboxylase. I. Preparation, properties, and cation specificity. McClure WR, Lardy HA, Kneifel HP. J Biol Chem. 1971 Jun 10246(11):3569-78.	PMID: 5578910	The values were calculated based on values mentioned in the cited literature
101161	Kcat of alpha-KGDC in heart	Pig Sus species	50400	1/hour	Cellular concentrations of Enzymes and Their Substrates, K.R. Albe et al, 1990, Journal of Theoretical Biology	PMID: 2200929	The values were calculated based on values mentioned in the Tables 1 and 2 of the cited literature
100953	Kcat of glycogen phosphorylase in Muscle	Rabbit	942000	1/hour	The purification and properties of rat muscle glycogen phosphorylase, Sevilla CL, Fischer EH, Biochemistry. 1969 May8(5):2161-71.	PMID: 4306642	The values were calculated based on values mentioned in the cited literature
101061	Kcat of Galactokinase in RBC	Human Homo sapiens	264	1/hour	Cellular concentrations of Enzymes and Their Substrates, K.R. Albe et al, 1990, Journal of Theoretical Biology	PMID: 2200929	The values were calculated based on values mentioned in the Tables 1 and 2 of the cited literature
101117	Kcat of Arginase in liver	Rat Rattus norvegicus	37596000	1/hour	Cellular concentrations of Enzymes and Their Substrates, K.R. Albe et al, 1990, Journal of Theoretical Biology	PMID: 2200929	The values were calculated based on values mentioned in the Tables 1 and 2 of the cited literature
101166	Kcat of Malate dehydrogenase in heart	Pig Sus species	444000	1/hour	Cellular concentrations of Enzymes and Their Substrates, K.R. Albe et al, 1990, Journal of Theoretical Biology	PMID: 2200929	The values were calculated based on values mentioned in the Tables 1 and 2 of the cited literature
101032	Kcat of Pyruvate kinase A in muscle	Rabbit	5700000	1/hour	Cellular concentrations of Enzymes and Their Substrates, K.R. Albe et al, 1990, Journal of Theoretical Biology	PMID: 2200929	The values were calculated based on values mentioned in the Tables 1 and 2 of the cited literature
101040	Kcat of F1,6-biphosphatase in muscle	Rabbit	192000	1/hour	Cellular concentrations of Enzymes and Their Substrates, K.R. Albe et al, 1990, Journal of Theoretical Biology	PMID: 2200929	The values were calculated based on values mentioned in the Tables 1 and 2 of the cited literature
101171	Kcat of Malic enzyme in heart	Pig Sus species	123600	1/hour	Cellular concentrations of Enzymes and Their Substrates, K.R. Albe et al, 1990, Journal of Theoretical Biology	PMID: 2200929	The values were calculated based on values mentioned in the Tables 1 and 2 of the cited literature
101005	Kcat of Aldolase in liver	Rat Rattus norvegicus	147600	1/hour	Structural relations in aldolases purified from rat liver and muscle and Novikoff hepatoma. Gracy RW, Lacko AG, Brox LW, Adelman RC, Horecker BL.Arch Biochem Biophys. 1970 Feb136(2):480-90.	PMID: 4314111	The values were calculated based on values mentioned in the cited literature
101147	Kcat of PDC in heart	Pig Sus species	18480	1/hour	Cellular concentrations of Enzymes and Their Substrates, K.R. Albe et al, 1990, Journal of Theoretical Biology	PMID: 2200929	The values were calculated based on values mentioned in the Tables 1 and 2 of the cited literature
101039	Kcat of F1,6-biphosphatase in liver	Rat Rattus norvegicus	324000	1/hour	Cellular concentrations of Enzymes and Their Substrates, K.R. Albe et al, 1990, Journal of Theoretical Biology	PMID: 2200929	The values were calculated based on values mentioned in the Tables 1 and 2 of the cited literature
101008	Kcat of Triosephosphate isomerase in muscle	Rabbit	21000000	1/hour	Cellular concentrations of Enzymes and Their Substrates, K.R. Albe et al, 1990, Journal of Theoretical Biology	PMID: 2200929	The values were calculated based on values mentioned in the Tables 1 and 2 of the cited literature
101114	Kcat of Gln synthetase in liver	Rat Rattus norvegicus	200400	1/hour	Cellular concentrations of Enzymes and Their Substrates, K.R. Albe et al, 1990, Journal of Theoretical Biology	PMID: 2200929	The values were calculated based on values mentioned in the Tables 1 and 2 of the cited literature
101034	Kcat of Pyruvate kinase in liver	Rat Rattus norvegicus	6672000	1/hour	Cellular concentrations of Enzymes and Their Substrates, K.R. Albe et al, 1990, Journal of Theoretical Biology	PMID: 2200929	The values were calculated based on values mentioned in the Tables 1 and 2 of the cited literature
101165	Kcat of Malate dehydrogenase in liver	Rat Rattus norvegicus	162000	1/hour	Cellular concentrations of Enzymes and Their Substrates, K.R. Albe et al, 1990, Journal of Theoretical Biology	PMID: 2200929	The values were calculated based on values mentioned in the Tables 1 and 2 of the cited literature
101045	Kcat of G6P dehydrogenase in RBC	Human Homo sapiens	684000	1/hour	Cohen P, Rosemeyer MA. Glucose-6-phosphate dehydrogenase from human erythrocytes. Methods Enzymol. 1975 41: 208-14.	236440	The values were calculated based on values mentioned in the cited literature
101054	Kcat of Transketolase in RBC	Human Homo sapiens	34020	1/hour	Cellular concentrations of Enzymes and Their Substrates, K.R. Albe et al, 1990, Journal of Theoretical Biology	PMID: 2200929	The values were calculated based on values mentioned in the Tables 1 and 2 of the cited literature
100993	Kcat of Phosphoglucoisomerase in muscle	Rabbit	7524000	1/hour	Cellular concentrations of Enzymes and Their Substrates, K.R. Albe et al, 1990, Journal of Theoretical Biology	PMID: 2200929	The values were calculated based on values mentioned in the Tables 1 and 2 of the cited literature
101109	Kcat of Tyr transaminase in liver	Rat Rattus norvegicus	1842000	1/hour	Cellular concentrations of Enzymes and Their Substrates, K.R. Albe et al, 1990, Journal of Theoretical Biology	PMID: 2200929	The values were calculated based on values mentioned in the Tables 1 and 2 of the cited literature
100947	Kcat of glycogen Synthetase in Muscle	Rabbit	180000	1/hour	Cellular concentrations of Enzymes and Their Substrates, K.R. Albe et al, 1990, Journal of Theoretical Biology	PMID: 2200929	The values were calculated based on values mentioned in the Tables 1 and 2 of the cited literature
101004	Kcat of Aldolase B in muscle	Rabbit	153600	1/hour	Cellular concentrations of Enzymes and Their Substrates, K.R. Albe et al, 1990, Journal of Theoretical Biology	PMID: 2200929	The values were calculated based on values mentioned in the Tables 1 and 2 of the cited literature
101010	Kcat of Triosephosphate isomerase in RBC	Human Homo sapiens	34380000	1/hour	Cellular concentrations of Enzymes and Their Substrates, K.R. Albe et al, 1990, Journal of Theoretical Biology	PMID: 2200929	The values were calculated based on values mentioned in the Tables 1 and 2 of the cited literature
